# Supplementary material for: Substrate-Dependent Trans-Stimulation of Organic Cation Transporter 2 Activity
Source: MDPI journal article supplement (doi:10.3390/ijms222312926), 2021-11-29
Supplement: s1 [file s1]

## Supplementary Material

IJMS Lefevre et al

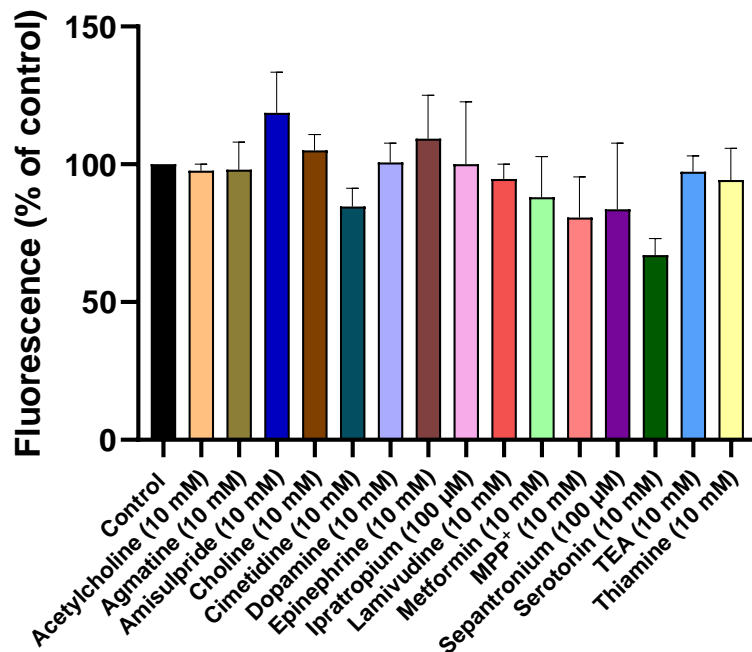

Figure S1. Effects of OCT2 substrates on DiASP-related fluorescence. Confluent HEK-OCT2 cells plated in 96-well plates were lysed in distilled water (155 µL/well). A 15 µL aliquot of 100 µM DiASP solution, without (control) or with OCT2 substrates (each used at the concentration indicated on the graph), was next added by well. DiASP-related fluorescence was finally determined by spectrofluorimetry. Data are expressed as % of fluorescence found in the absence of OCT2 substrates (control), arbitrary set at 100%, and are the means  $\pm$  SEM of three assays; their statistical analysis (ANOVA followed by the Dunnett's post-hoc test) demonstrated no significant effect of OCT2 substrates towards DiASP-related fluorescence ( $p > 0.05$ ).

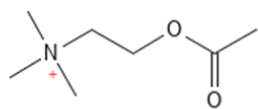**Acetylcholine**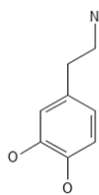**Dopamine**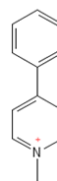**MPP<sup>+</sup>**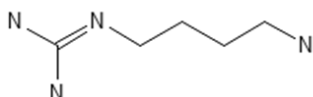**Agmatine**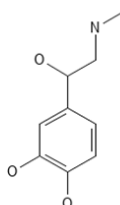**Epinephrine**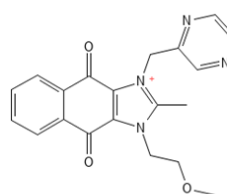**Sepantronium**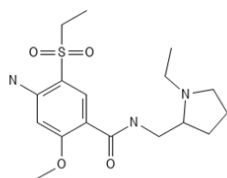**Amisulpride**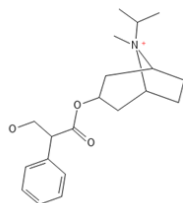**Ipratropium**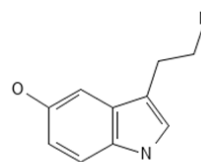**Serotonin**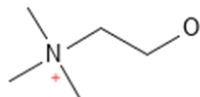**Choline**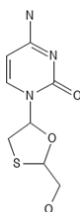**Lamivudine**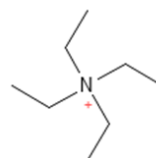**TEA**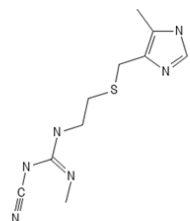**Cimetidine**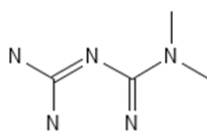**Metformin**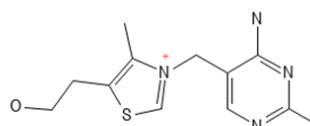**Thiamine**

Figure S2. Chemical structures of OCT2 substrates

Table S1. List of analysed molecular descriptors.

| Name  | Description                                                         | Block                  |
|-------|---------------------------------------------------------------------|------------------------|
| MW    | molecular weight                                                    | Constitutional indices |
| AMW   | average molecular weight                                            | Constitutional indices |
| Sv    | sum of atomic van der Waals volumes (scaled on Carbon atom)         | Constitutional indices |
| Se    | sum of atomic Sanderson electronegativities (scaled on Carbon atom) | Constitutional indices |
| Sp    | sum of atomic polarizabilities (scaled on Carbon atom)              | Constitutional indices |
| Si    | sum of first ionization potentials (scaled on Carbon atom)          | Constitutional indices |
| Mv    | mean atomic van der Waals volume (scaled on Carbon atom)            | Constitutional indices |
| Me    | mean atomic Sanderson electronegativity (scaled on Carbon atom)     | Constitutional indices |
| Mp    | mean atomic polarizability (scaled on Carbon atom)                  | Constitutional indices |
| Mi    | mean first ionization potential (scaled on Carbon atom)             | Constitutional indices |
| GD    | graph density                                                       | Constitutional indices |
| nAT   | number of atoms                                                     | Constitutional indices |
| nSK   | number of non-H atoms                                               | Constitutional indices |
| nTA   | number of terminal atoms                                            | Constitutional indices |
| nBT   | number of bonds                                                     | Constitutional indices |
| nBO   | number of non-H bonds                                               | Constitutional indices |
| nBM   | number of multiple bonds                                            | Constitutional indices |
| SCBO  | sum of conventional bond orders (H-depleted)                        | Constitutional indices |
| RBN   | number of rotatable bonds                                           | Constitutional indices |
| RBF   | rotatable bond fraction                                             | Constitutional indices |
| nDB   | number of double bonds                                              | Constitutional indices |
| nTB   | number of triple bonds                                              | Constitutional indices |
| nAB   | number of aromatic bonds                                            | Constitutional indices |
| nH    | number of Hydrogen atoms                                            | Constitutional indices |
| nC    | number of Carbon atoms                                              | Constitutional indices |
| nN    | number of Nitrogen atoms                                            | Constitutional indices |
| nO    | number of Oxygen atoms                                              | Constitutional indices |
| nP    | number of Phosphorous atoms                                         | Constitutional indices |
| nS    | number of Sulfur atoms                                              | Constitutional indices |
| nF    | number of Fluorine atoms                                            | Constitutional indices |
| nCL   | number of Chlorine atoms                                            | Constitutional indices |
| nBR   | number of Bromine atoms                                             | Constitutional indices |
| nI    | number of Iodine atoms                                              | Constitutional indices |
| nB    | number of Boron atoms                                               | Constitutional indices |
| nHM   | number of heavy atoms                                               | Constitutional indices |
| nHet  | number of heteroatoms                                               | Constitutional indices |
| nX    | number of halogen atoms                                             | Constitutional indices |
| H%    | percentage of H atoms                                               | Constitutional indices |
| C%    | percentage of C atoms                                               | Constitutional indices |
| N%    | percentage of N atoms                                               | Constitutional indices |
| O%    | percentage of O atoms                                               | Constitutional indices |
| X%    | percentage of halogen atoms                                         | Constitutional indices |
| nCsp3 | number of sp3 hybridized Carbon atoms                               | Constitutional indices |

Table S1 (continued)

| Name        | Description                                                               | Block                  |
|-------------|---------------------------------------------------------------------------|------------------------|
| nCsp2       | number of sp <sup>2</sup> hybridized Carbon atoms                         | Constitutional indices |
| nCsp        | number of sp hybridized Carbon atoms                                      | Constitutional indices |
| nStructures | number of disconnected structures                                         | Constitutional indices |
| totalcharge | total charge                                                              | Constitutional indices |
| qpmax       | maximum positive charge                                                   | Charge descriptors     |
| qnmax       | maximum negative charge                                                   | Charge descriptors     |
| Qpos        | total positive charge                                                     | Charge descriptors     |
| Qneg        | total negative charge                                                     | Charge descriptors     |
| Qtot        | total absolute charge (electronic charge index - ECI)                     | Charge descriptors     |
| Qmean       | mean absolute charge (charge polarization)                                | Charge descriptors     |
| Q2          | total squared charge                                                      | Charge descriptors     |
| RPCG        | relative positive charge                                                  | Charge descriptors     |
| RNCG        | relative negative charge                                                  | Charge descriptors     |
| SPP         | submolecular polarity parameter                                           | Charge descriptors     |
| TE1         | topographic electronic descriptor                                         | Charge descriptors     |
| TE2         | topographic electronic descriptor (bond restricted)                       | Charge descriptors     |
| PCWTE1      | partial charge weighted topological electronic index                      | Charge descriptors     |
| PCWTE2      | partial charge weighted topological electronic index (bond restricted)    | Charge descriptors     |
| LDI         | local dipole index                                                        | Charge descriptors     |
| Uc          | unsaturation count                                                        | Molecular properties   |
| Ui          | unsaturation index                                                        | Molecular properties   |
| Hy          | hydrophilic factor                                                        | Molecular properties   |
| AMR         | Ghose-Crippen molar refractivity                                          | Molecular properties   |
| TPSA(NO)    | topological polar surface area using N,O polar contributions              | Molecular properties   |
| TPSA(Tot)   | topological polar surface area using N,O,S,P polar contributions          | Molecular properties   |
| MLOGP       | Moriguchi octanol-water partition coeff. (logP)                           | Molecular properties   |
| MLOGP2      | squared Moriguchi octanol-water partition coeff. (logP <sup>2</sup> )     | Molecular properties   |
| ALOGP       | Ghose-Crippen octanol-water partition coeff. (logP)                       | Molecular properties   |
| ALOGP2      | squared Ghose-Crippen octanol-water partition coeff. (logP <sup>2</sup> ) | Molecular properties   |
| SAtot       | total surface area from P_VSA-like descriptors                            | Molecular properties   |
| SAacc       | surface area of acceptor atoms from P_VSA-like descriptors                | Molecular properties   |
| SAdon       | surface area of donor atoms from P_VSA-like descriptors                   | Molecular properties   |
| Vx          | McGowan volume                                                            | Molecular properties   |
| VvdwMG      | van der Waals volume from McGowan volume                                  | Molecular properties   |
| VvdwZAZ     | van der Waals volume from Zhao-Abraham-Zissimos equation                  | Molecular properties   |
| PDI         | packing density index                                                     | Molecular properties   |
| BLTF96      | Verhaar Fish base-line toxicity from MLOGP (mmol/l)                       | Molecular properties   |
| BLTD48      | Verhaar Daphnia base-line toxicity from MLOGP (mmol/l)                    | Molecular properties   |
| BLTA96      | Verhaar Algae base-line toxicity from MLOGP (mmol/l)                      | Molecular properties   |
